# Supplementary figures and images for: Impact of noise on inverse design: the case of NMR spectra matching
Source: Royal Society of Chemistry journal article supplement (doi:10.1039/d3dd00132f), 2023-10-17

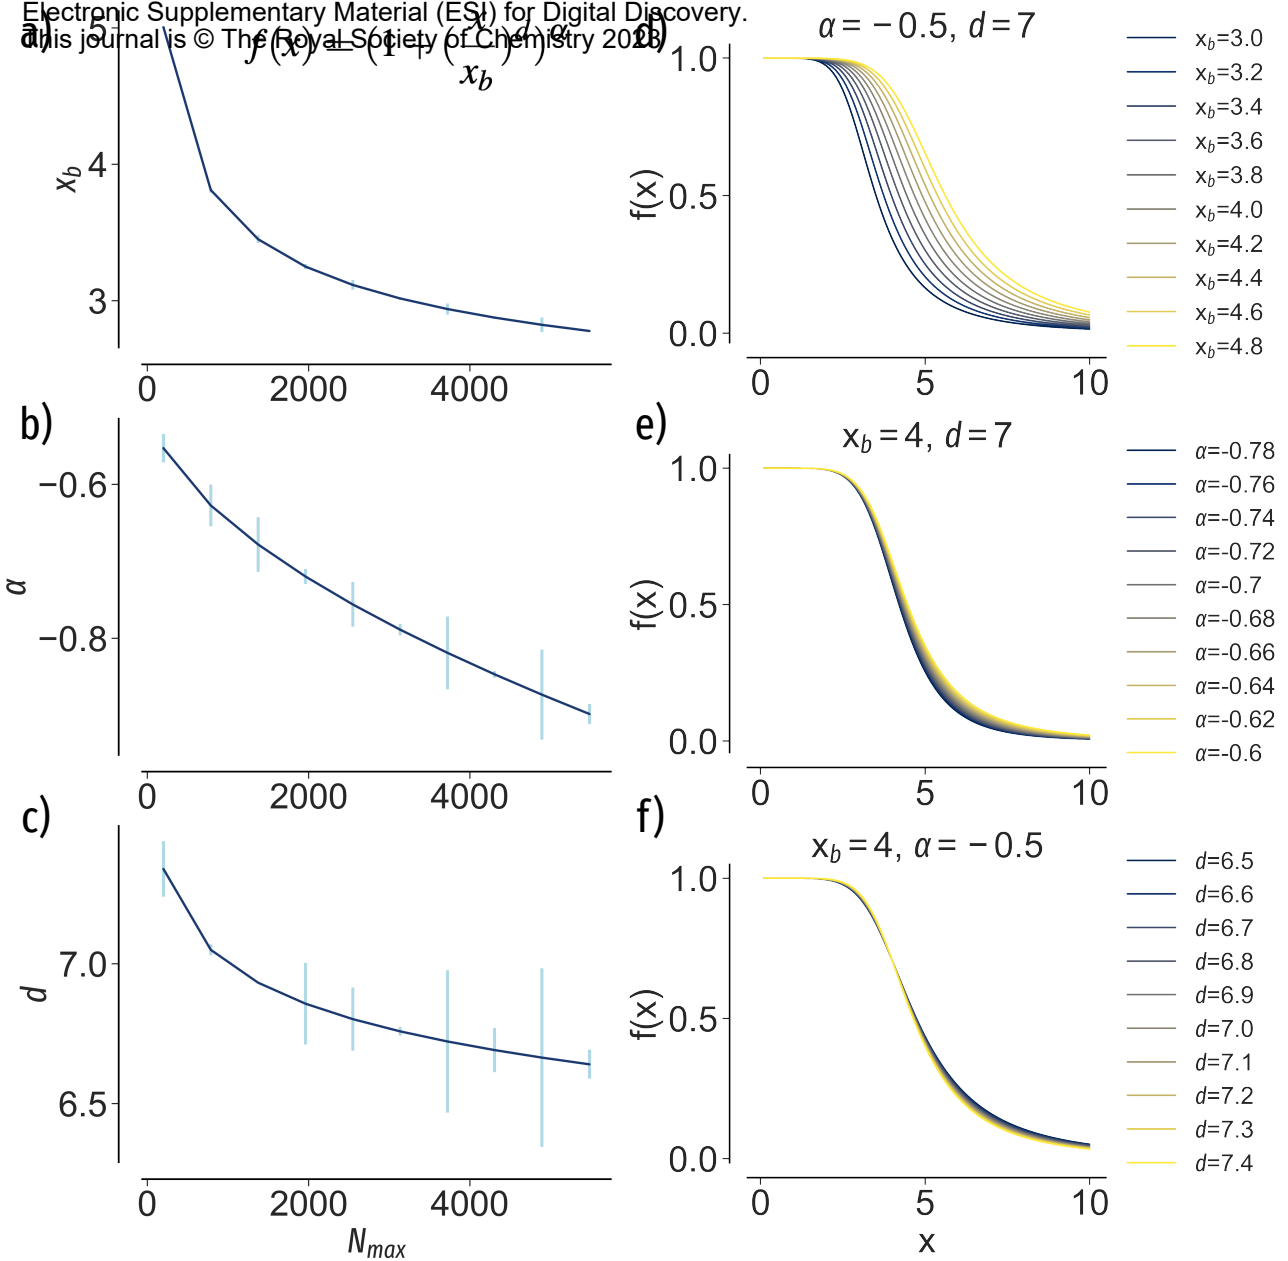

Supplement: d3dd00132f1.pdf [file d3dd00132f1.pdf]

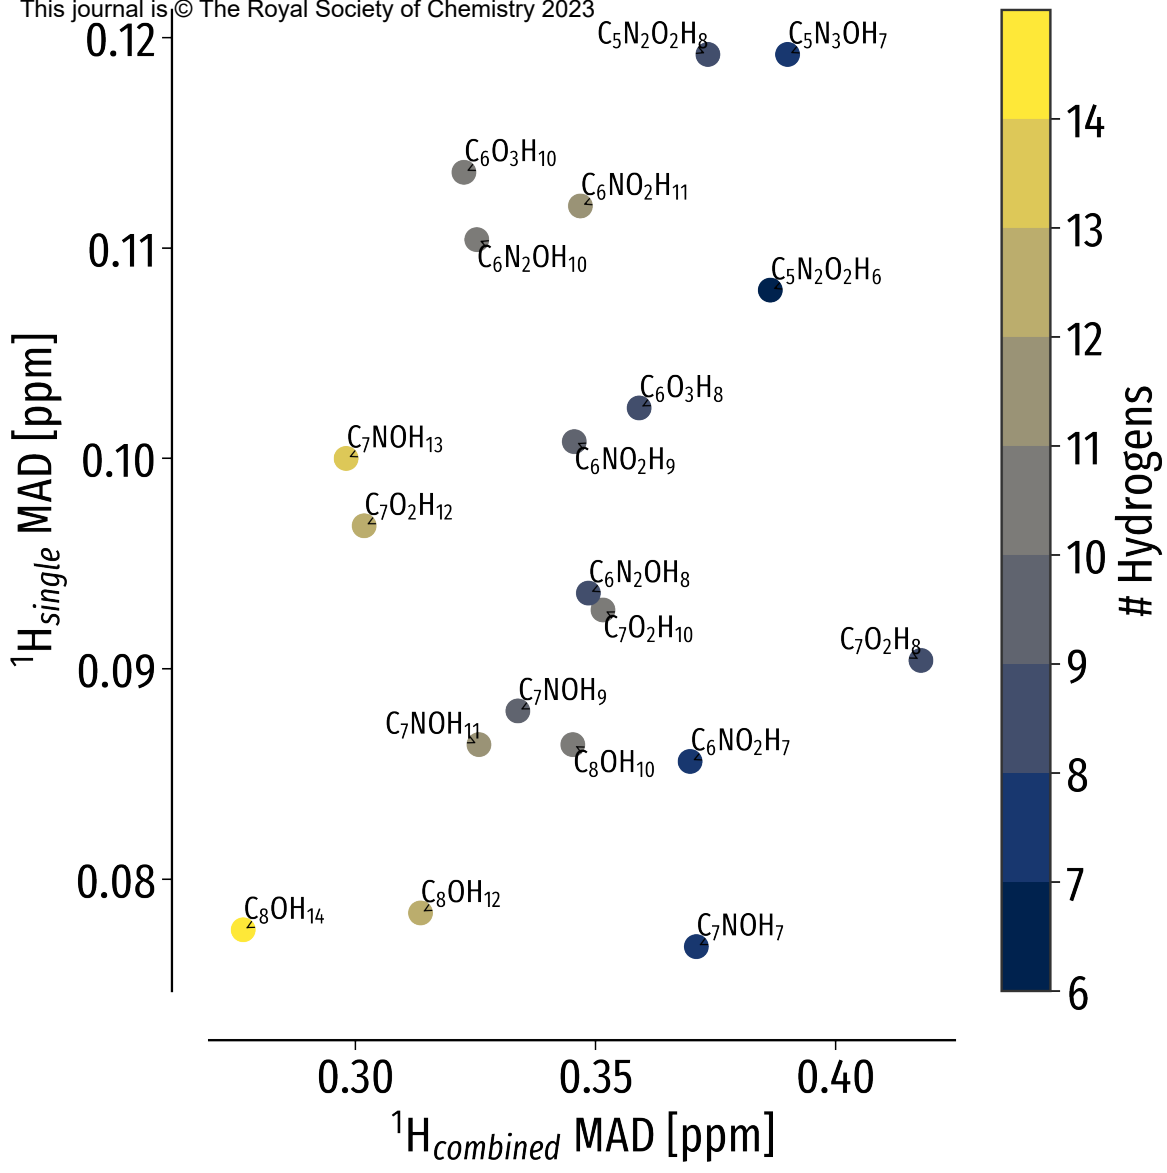

Supplement: d3dd00132f2.pdf [file d3dd00132f2.pdf]

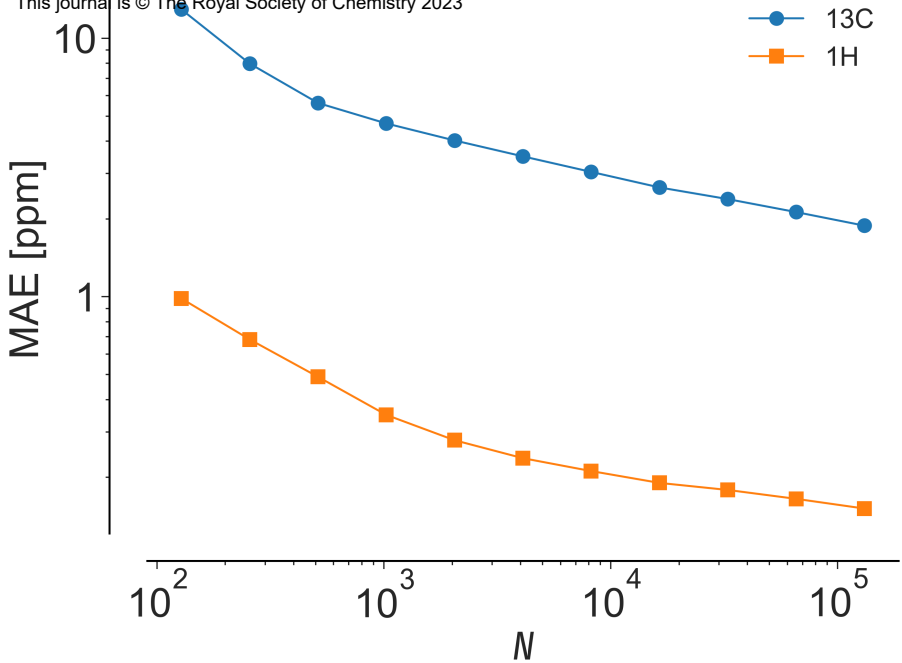

Supplement: d3dd00132f3.pdf [file d3dd00132f3.pdf]

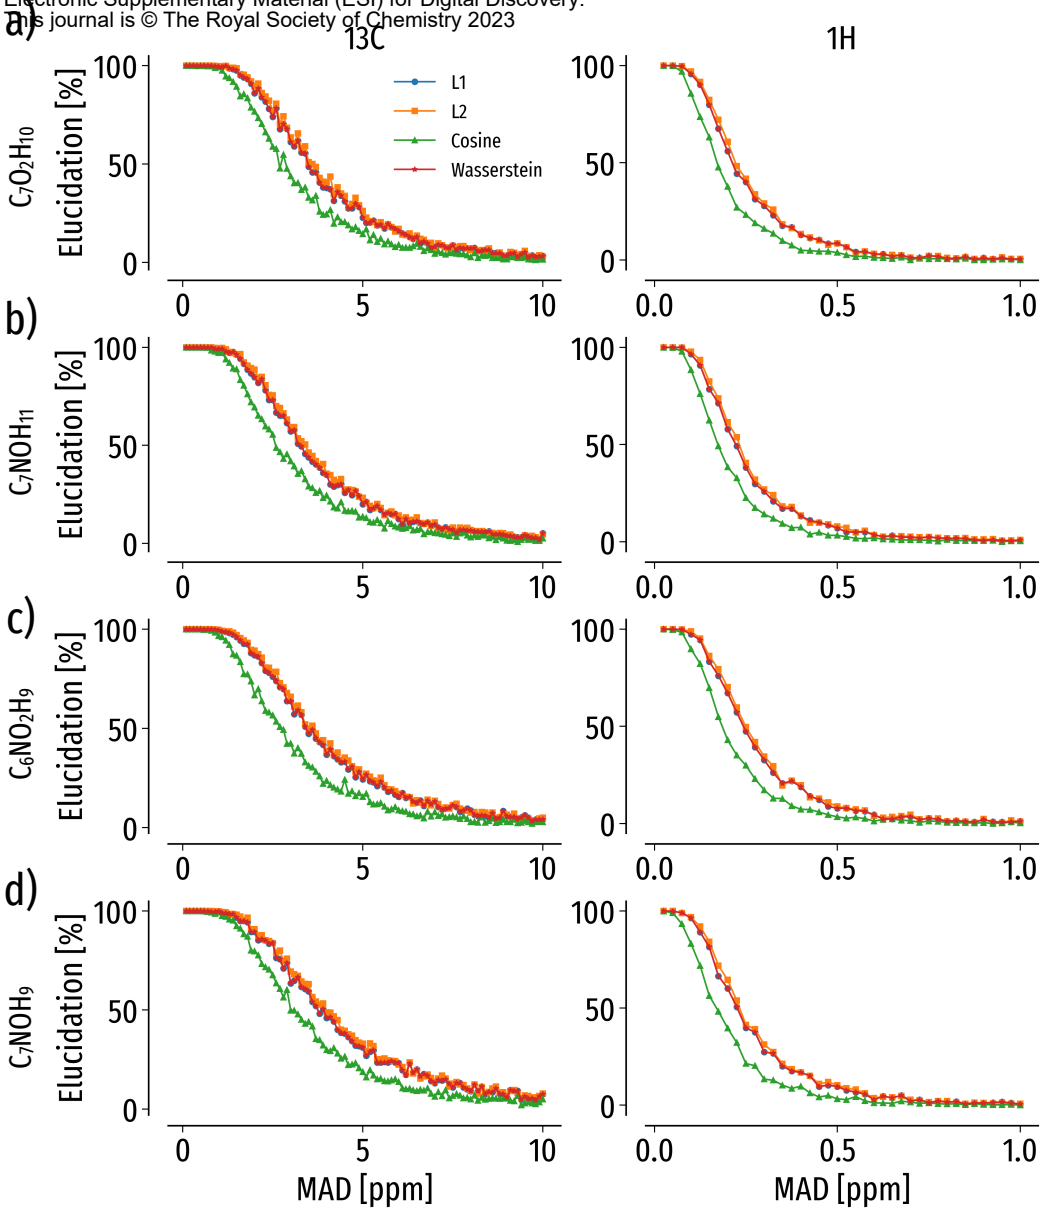

Supplement: d3dd00132f4.pdf [file d3dd00132f4.pdf]

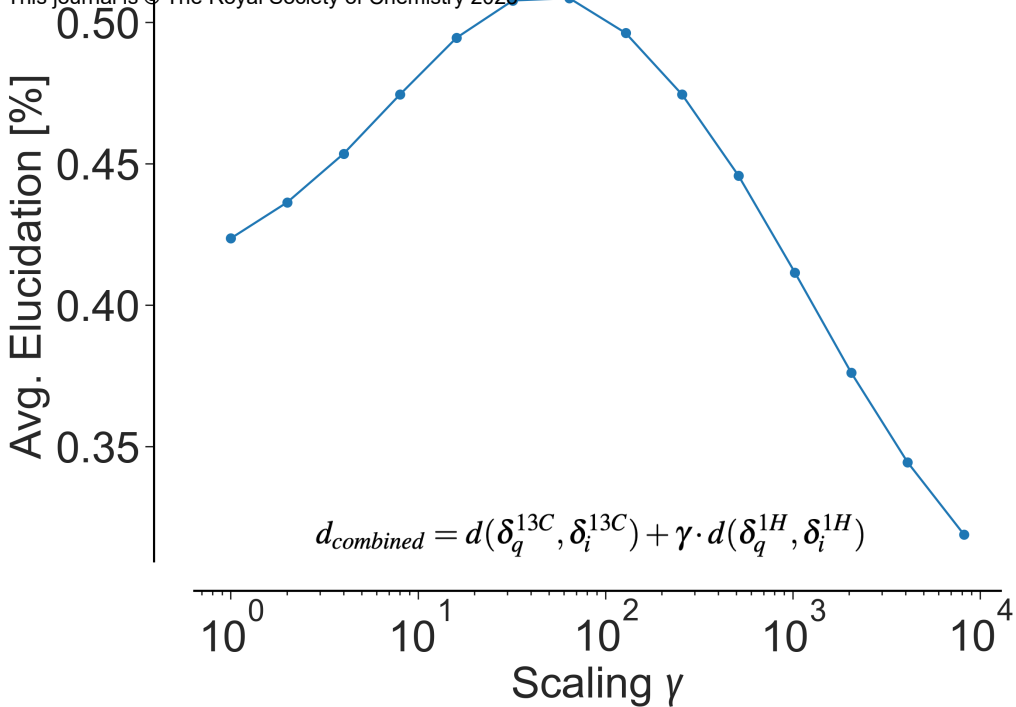

Supplement: d3dd00132f5.pdf [file d3dd00132f5.pdf]
